# Supplementary material for: Oviparous elasmobranch development inside the egg case in 7 key stages
Source: PubMed Central journal article supplement (PMC6219803; doi:10.1371/journal.pone.0206984), 2018-11-06

Original photographs of Fig 1 illustration. External features of the *S. stellaris* egg case at developmental stage 1.

**Fig 1**

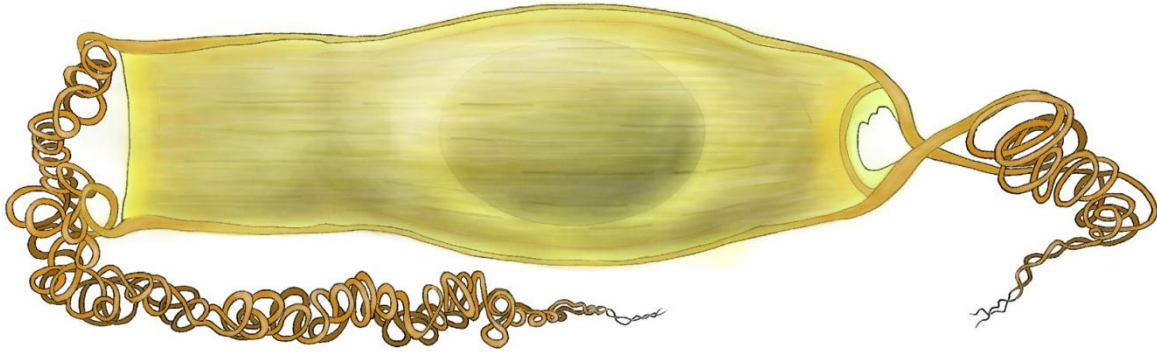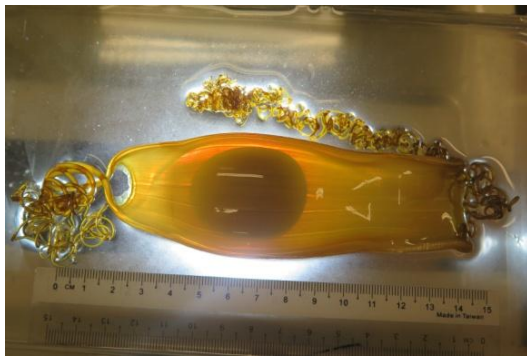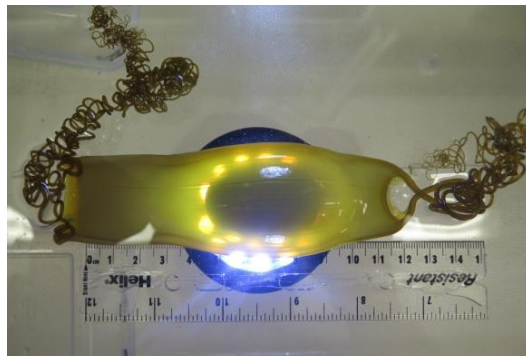

Supplement: pone.0206984.s001.pdf [file pone.0206984.s001.pdf]
