# Supplementary material for: Oviparous elasmobranch development inside the egg case in 7 key stages
Source: PubMed Central journal article supplement (PMC6219803; doi:10.1371/journal.pone.0206984), 2018-11-06

Original photographs of Fig 2 illustrations. The inside of the *S. stellaris* egg case at developmental stage 2.

**Fig 2A**

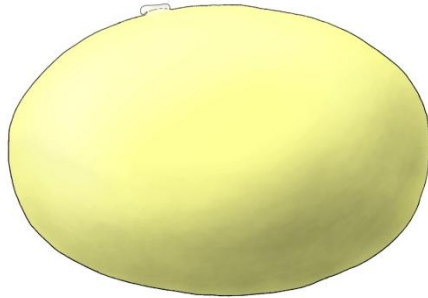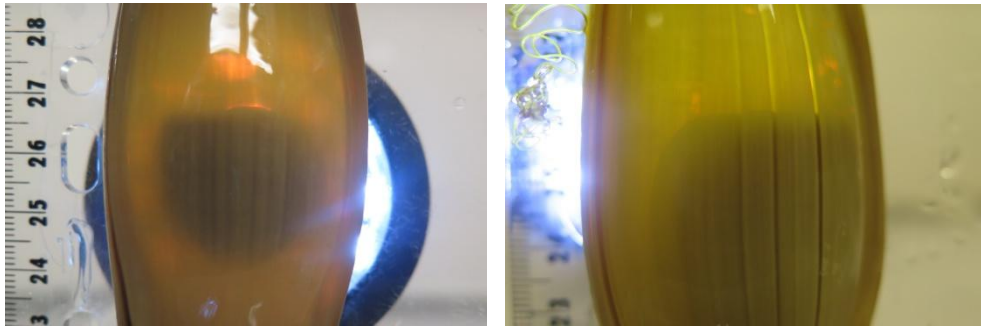

**Fig 2B**

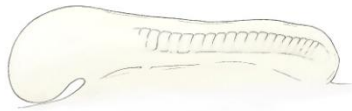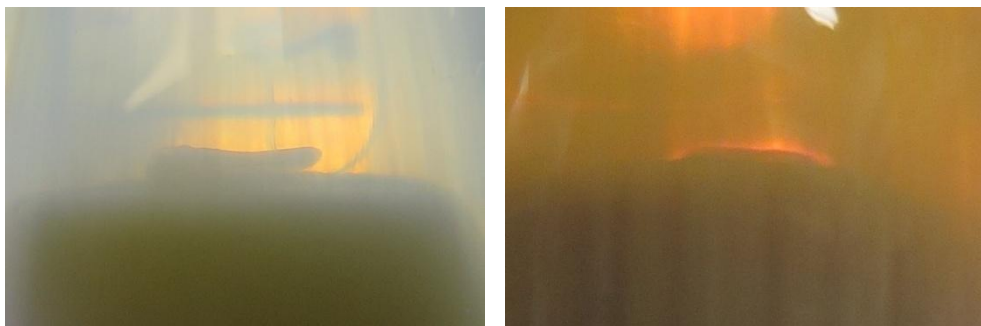

Supplement: pone.0206984.s002.pdf [file pone.0206984.s002.pdf]
