# Supplementary material for: Oviparous elasmobranch development inside the egg case in 7 key stages
Source: PubMed Central journal article supplement (PMC6219803; doi:10.1371/journal.pone.0206984), 2018-11-06

Original photographs of Fig 3 illustrations. The inside of the *S. stellaris* egg case at developmental stage 3.

**Fig 3A**

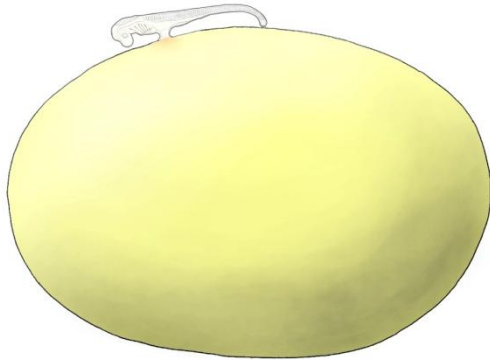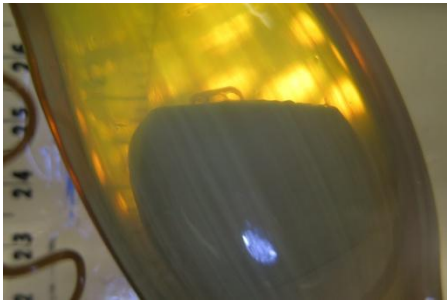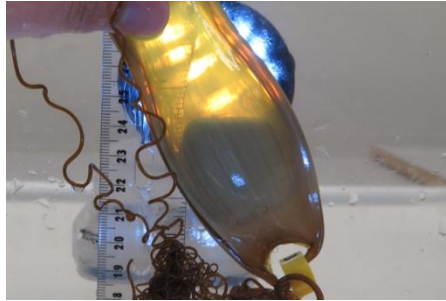

**Fig 3B**

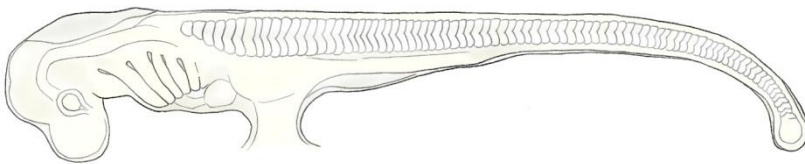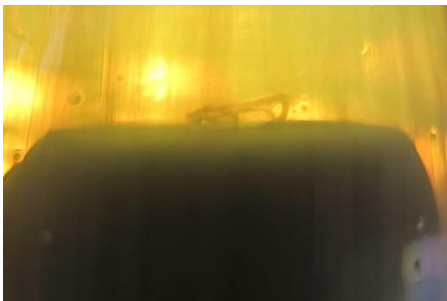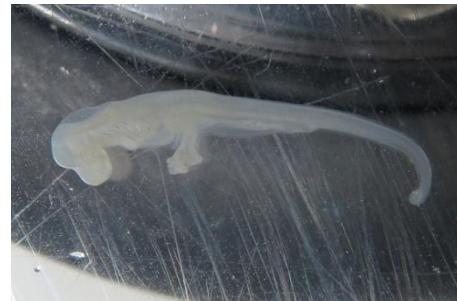

**Fig 3C**

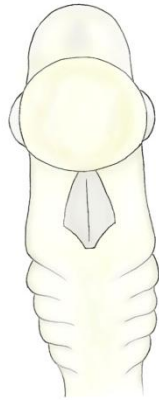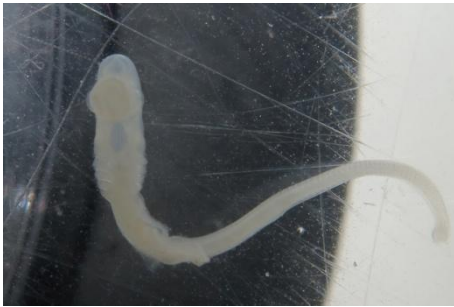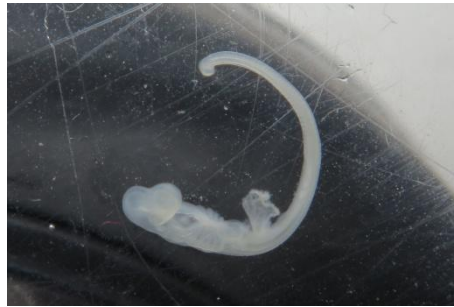

Supplement: pone.0206984.s003.pdf [file pone.0206984.s003.pdf]
