# Supplementary material for: Oviparous elasmobranch development inside the egg case in 7 key stages
Source: PubMed Central journal article supplement (PMC6219803; doi:10.1371/journal.pone.0206984), 2018-11-06

Original photographs of Fig 6 illustrations. The inside of the *S. stellaris* egg case at developmental stage 6 with the egg yolk mass and the associated embryo.

**Fig 6A**

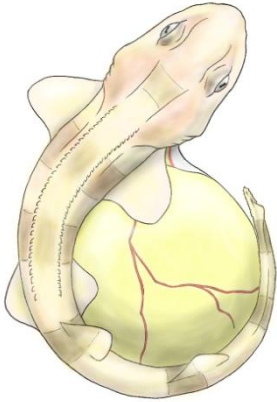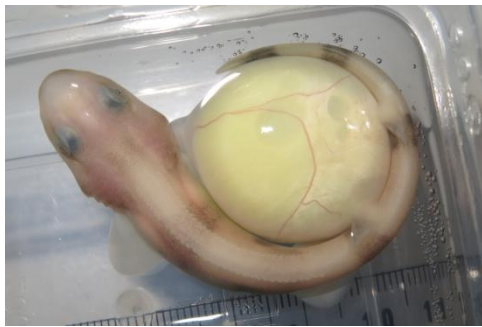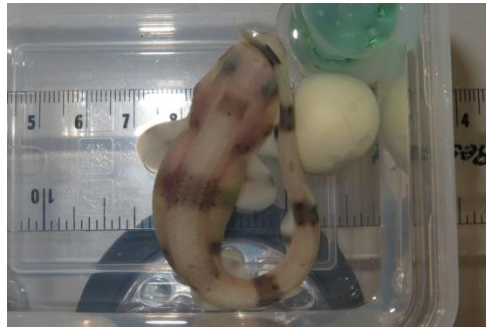

**Fig 6B**

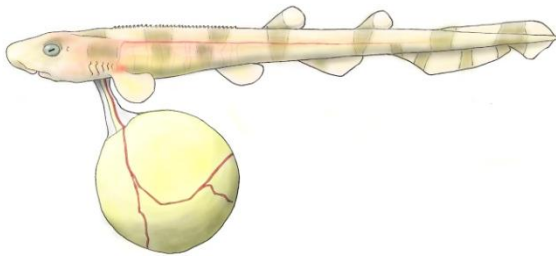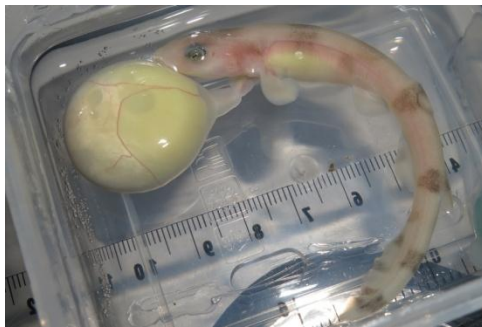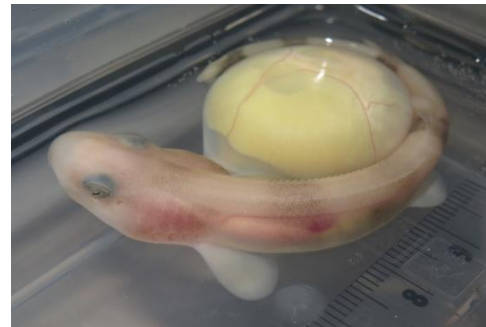

**Fig 6C**

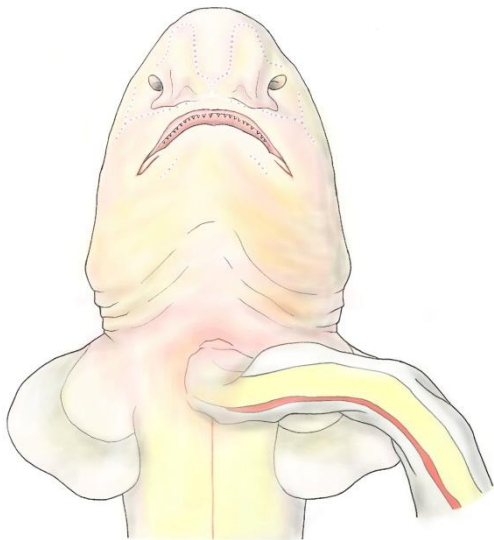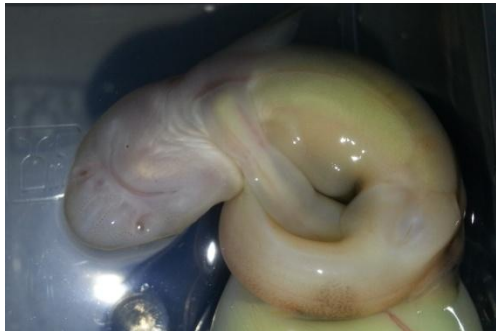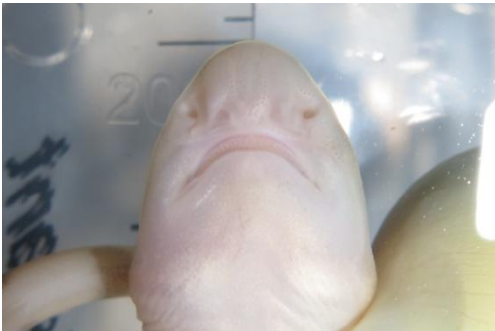

Supplement: pone.0206984.s006.pdf [file pone.0206984.s006.pdf]
