# Supplementary material for: Oviparous elasmobranch development inside the egg case in 7 key stages
Source: PubMed Central journal article supplement (PMC6219803; doi:10.1371/journal.pone.0206984), 2018-11-06

Original photographs of Fig 7 illustrations. The *S. stellaris* embryo inside of the egg case at the end of developmental stage 7 with the egg yolk mass completely absorbed.

**Fig 7A**

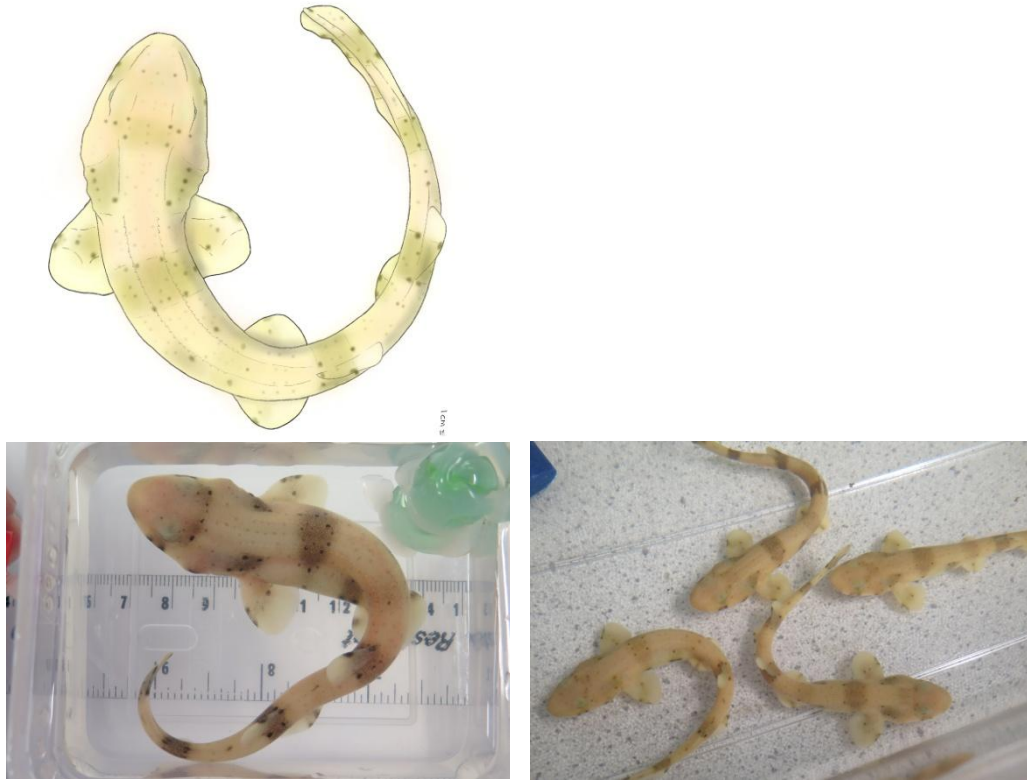

**Fig 7B**

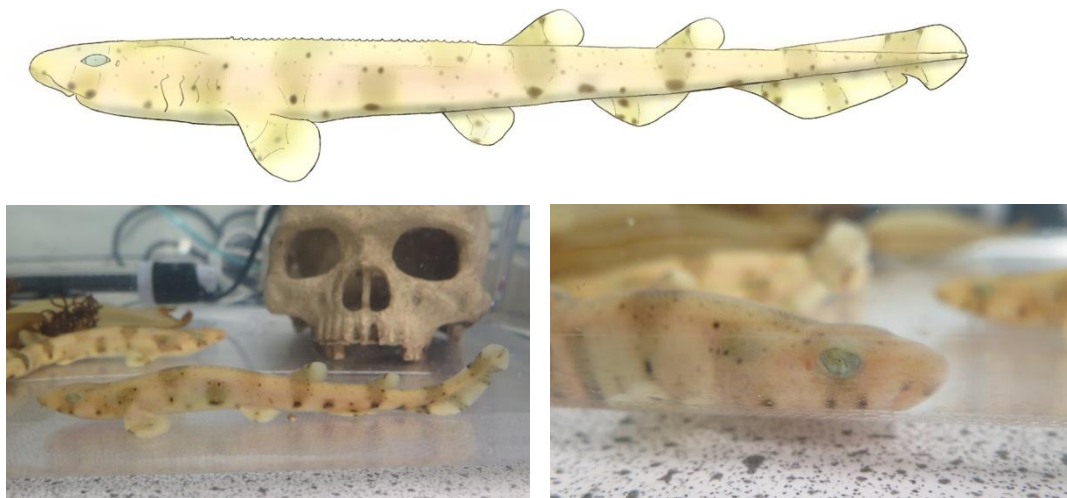

**Fig 7C**

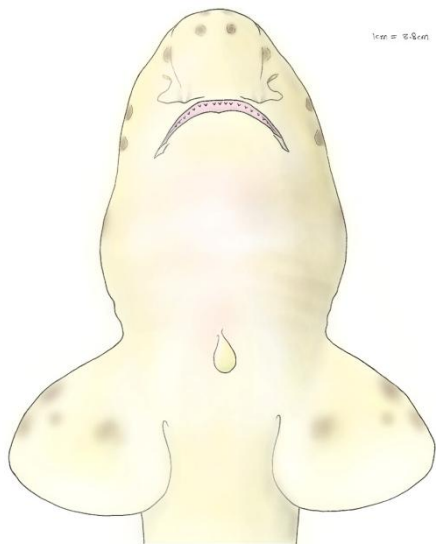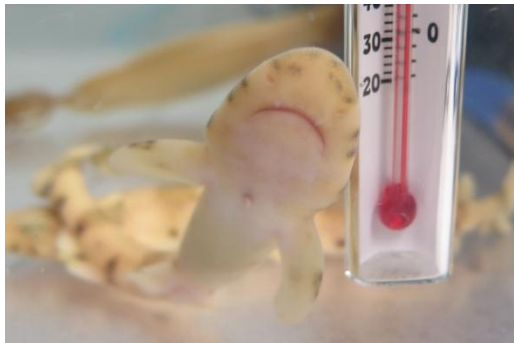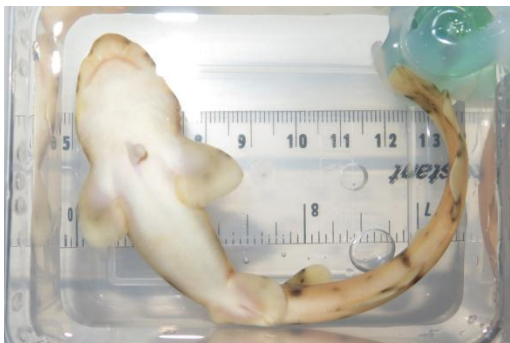

Supplement: pone.0206984.s007.pdf [file pone.0206984.s007.pdf]
